# Supplementary material for: Waterpipe and cigarette tobacco smoking among Palestinian university students: a cross-sectional study
Source: Springer Nature journal article supplement (doi:10.1186/s12889-017-4524-0), 2017-07-10
Supplement: MOESM1 [file 13292338]

Table 4 Logistic regression for current waterpipe tobacco smoking and cigarette smoking by participants' characteristics for men in the sample only (n = 929) and women in the sample only (n = 962)

| Characteristic                                 | Waterpipe tobacco smoking |                   | Cigarette smoking |                   |
|------------------------------------------------|---------------------------|-------------------|-------------------|-------------------|
|                                                | Men                       | Women             | Men               | Women             |
|                                                | AOR (95% CI)              | AOR (95% CI)      | AOR (95% CI)      | AOR (95% CI)      |
| <b>Locality</b>                                |                           |                   |                   |                   |
| Urban & Camp <sup>R</sup>                      | -                         | -                 | 1                 | -                 |
| Rural                                          | -                         | -                 | 2.08 (1.24–3.51)  | -                 |
| <b>Geographic area of residence</b>            |                           |                   |                   |                   |
| Gaza Strip <sup>R</sup>                        | 1                         | 1                 | 1                 | 1                 |
| North West Bank                                | 2.58 (1.80–3.68)          | 7.23 (3.16–16.53) | 4.48 (2.96–6.79)  | 5.65 (1.32–24.13) |
| Central West Bank                              | 1.53 (1.02–2.31)          | 9.54 (4.64–19.65) | 2.45 (1.54–3.88)  | 8.71 (2.47–30.79) |
| South West Bank                                | 2.31 (1.45–3.66)          | 6.43 (3.17–13.02) | 3.00 (1.79–5.05)  | 4.41 (1.20–16.24) |
| <b>Living arrangement</b>                      |                           |                   |                   |                   |
| With family <sup>R</sup>                       | -                         | -                 | -                 | -                 |
| Other                                          | -                         | -                 | -                 | -                 |
| <b>Employment status</b>                       |                           |                   |                   |                   |
| Not employed <sup>R</sup>                      | -                         | -                 | -                 | -                 |
| Employed                                       | -                         | -                 | -                 | -                 |
| <b>Father's highest educational attainment</b> |                           |                   |                   |                   |
| Less than high school <sup>R</sup>             | -                         | -                 | -                 | 1                 |
| High school & above                            | -                         | -                 | -                 | 4.78 (1.12–20.29) |
| <b>Mother's highest educational attainment</b> |                           |                   |                   |                   |
| Less than high school <sup>R</sup>             | -                         | -                 | -                 | -                 |
| High school & above                            | -                         | -                 | -                 | -                 |
| <b>Self-reported economic standing</b>         |                           |                   |                   |                   |
| Poor <sup>R</sup>                              | 1                         | -                 | -                 | -                 |
| Good                                           | 1.32 (0.93–1.88)          | -                 | -                 | -                 |
| Very good                                      | 1.84 (1.27–2.66)          | -                 | -                 | -                 |
| <b>Current faculty of study</b>                |                           |                   |                   |                   |
| Sciences & health sciences <sup>R</sup>        | -                         | -                 | 1                 | -                 |
| Arts & humanities                              | -                         | -                 | 1.44 (1.04–1.99)  | -                 |
| <b>Self-reported academic achievement</b>      |                           |                   |                   |                   |
| GPA <sup>b</sup> ≥ 80.0 <sup>R</sup>           | 1                         | 1                 | 1                 | -                 |
| GPA 70.0–79.9                                  | 1.92 (1.36–2.72)          | 1.76 (1.12–2.75)  | 2.39 (1.61–3.54)  | -                 |
| GPA ≤ 69.9                                     | 2.89 (1.79–4.67)          | 3.76 (1.82–7.63)  | 5.87 (3.46–9.99)  | -                 |

<sup>R</sup>Reference category

<sup>b</sup>GPA Grade point average
